# Supplementary material for: Empirical examination of the replicability of associations between brain structure and psychological variables
Source: eLife journal article supplement (doi:10.7554/elife.43464), 2019-03-13
Supplement: supp [file elife-43464-supp-v1.zip]

Archive with 4 entries (4 files):
- elife_poa_e43464_Supplementary_File_1.docx
- elife_poa_e43464_Figure_2_figure_supplement_1.pdf
- elife_poa_e43464_Figure_4_figure_supplement_1.pdf
- elife_poa_e43464_Transparent_Reporting_File.pdf
