# Supplementary material for: Empirical examination of the replicability of associations between brain structure and psychological variables
Source: eLife journal article supplement (doi:10.7554/elife.43464), 2019-03-13

A

## Exploratory Analysis

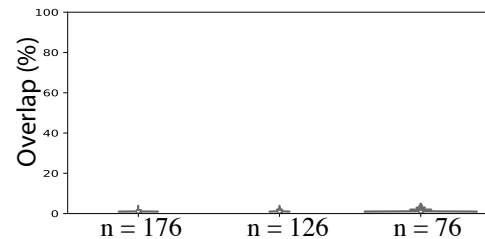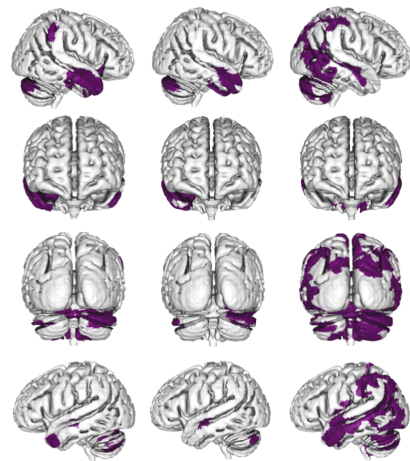

Overlap (%)

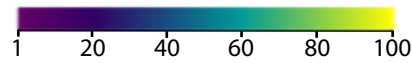

B

## Confirmatory analysis

70% discovery / 30% test

50% discovery / 50% test

30% discovery / 70% test

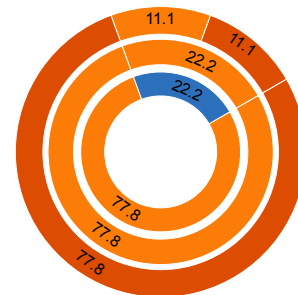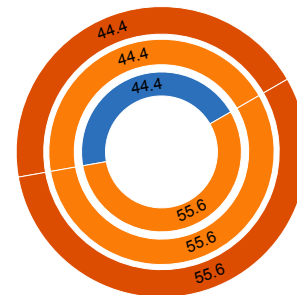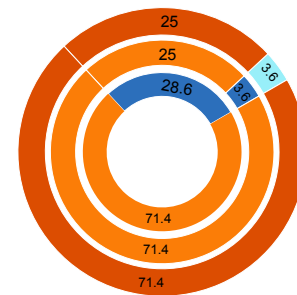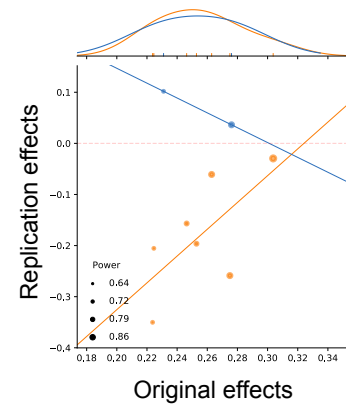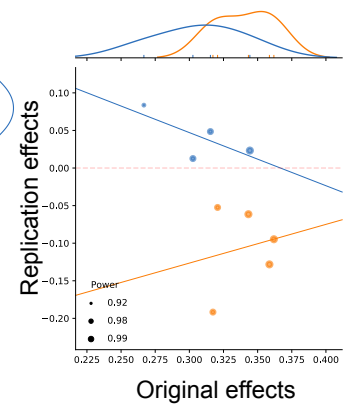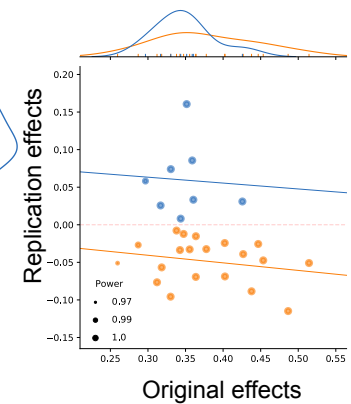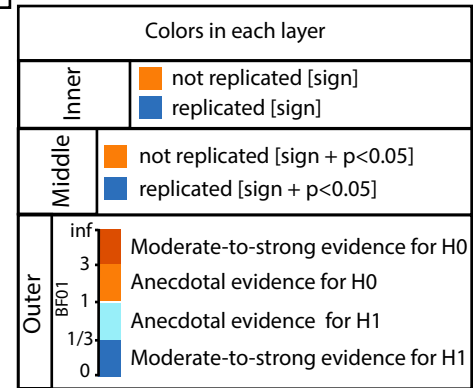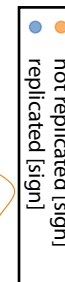

Supplement: supp [file elife-43464-supp-v1.zip › elife_poa_e43464_Figure_4_figure_supplement_1.pdf]
