# Supplementary material for: Empirical examination of the replicability of associations between brain structure and psychological variables
Source: eLife journal article supplement (doi:10.7554/elife.43464), 2019-03-13

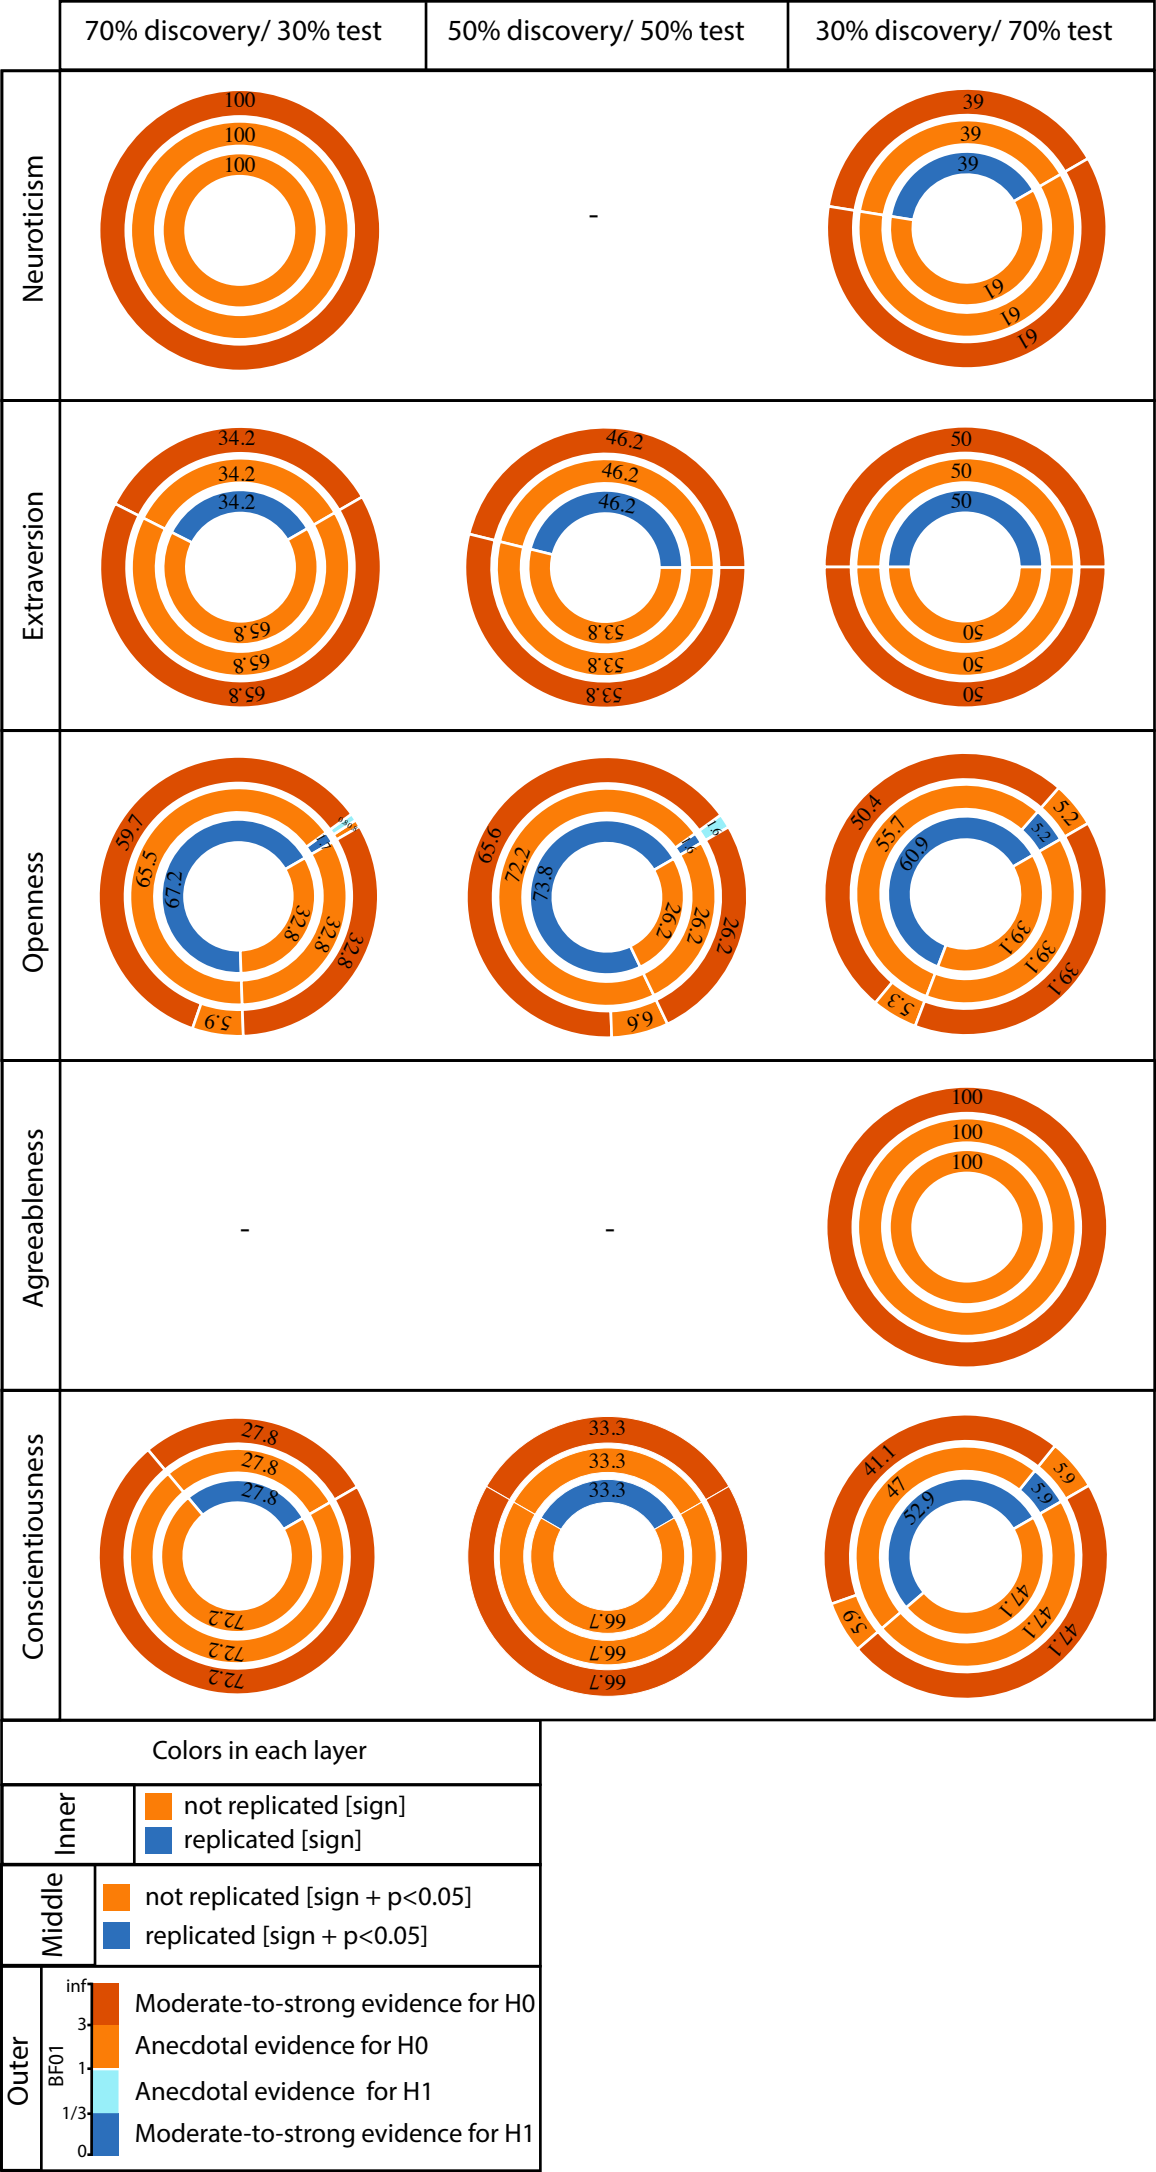

Supplement: supp [file elife_poa_e43464_Figure_2_figure_supplement_1.pdf › elife_poa_e43464_Figure_2_figure_supplement_1.pdf]
